# Supplementary material
Source: MDPI journal article supplement (https://www.mdpi.com/2312-7481/9/8/203)
Supplement: s1 [file s1 › magnetochemistry-2497262-supplementary.pdf]

## Supplementary materials

Figure S1

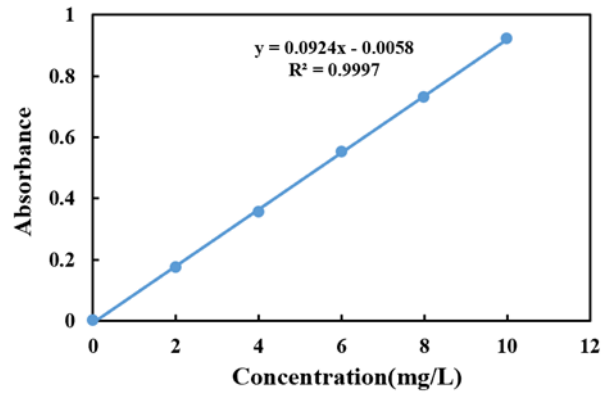

Fig.S1 The standard curve of ofloxacin.

Figure S2

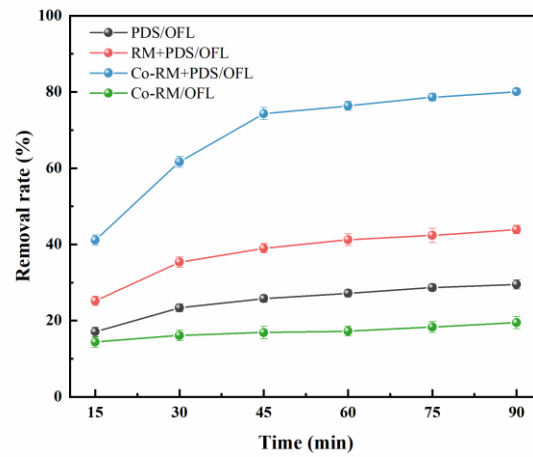

(Experimental condition:  $[Co-RM]_0 = 0.4$  g/L;  $[PDS]_0 = 4.0$  g/L;  $[OFL]_0 = 15$  mg/L; pH=3.0;  $T = 40^\circ C$ )

Fig.S2 Removal rate of OFL for different reaction systems.

**Figure S3**

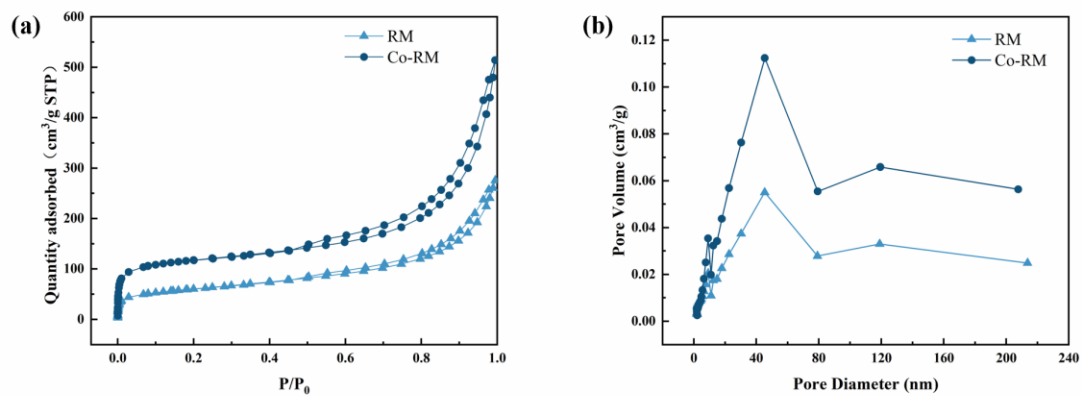

Fig.S3 (a) N2 adsorption-desorption isotherms of RM and Co-RM (b) Pore size distribution of RM and Co-RM.

**Figure S4**

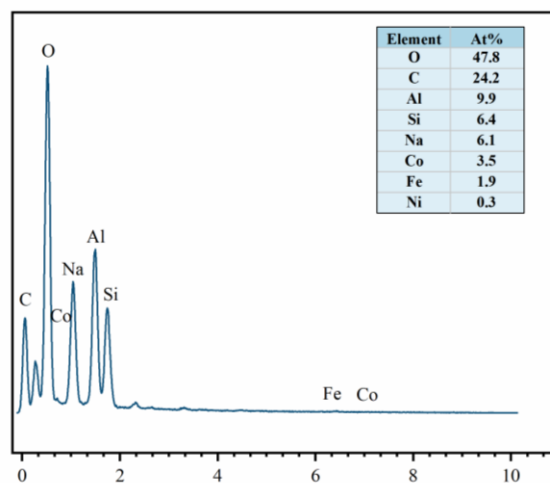

Fig.S4 EDS analysis of Co-RM.

**Figure S5**

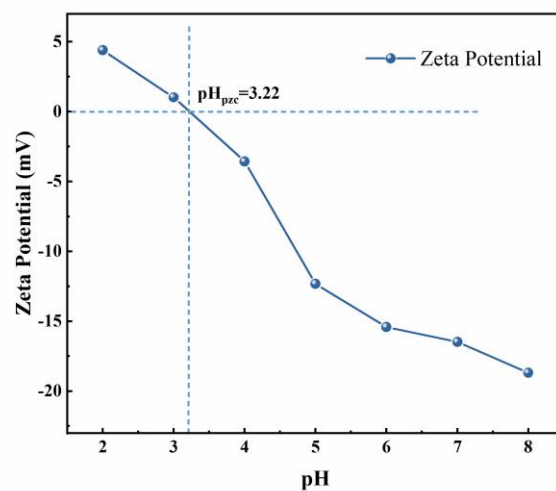

Fig.S5 Co-RM surface zeta potential with pH.

**Figure S6**

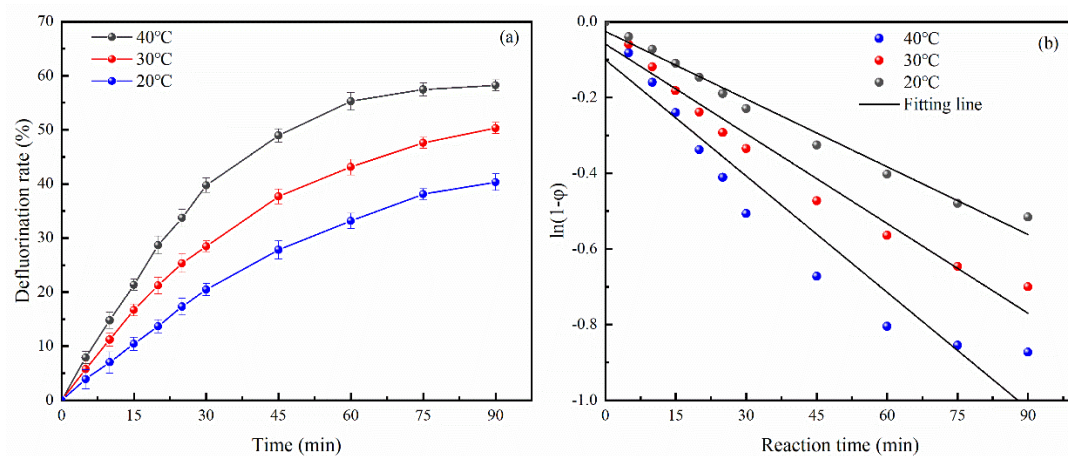

Fig.S6 The influence of Co-RM catalyst activation of PDS on the defluorination of OFL: (a)

defluorination rate, (b) defluorination kinetics.

**Table.S1**

Table.S1 Possible intermediates of ofloxacin (OFL).

| Number | m/z    | Molecular formula     | Proposed structure |
|--------|--------|-----------------------|--------------------|
| OFL    | 362    | $C_{18}H_{20}FN_3O_4$ |                    |
| P1     | 318    | $C_{17}H_{19}FN_3O_2$ |                    |
| P2     | 290    | $C_{15}H_{19}N_3O_2$  |                    |
| P3     | 149    | $C_{10}H_{15}N$       |                    |
| P4     | 274    | $C_{16}H_{18}N_3O_4$  |                    |
| P5     | 212    | $C_{11}H_9NO_2$       |                    |
| P6     | 145    | $C_9H_7NO$            |                    |
| P7     | 363.12 | $C_{17}H_{18}FN_3O_5$ |                    |
| P8     | 321    | $C_{15}H_{16}FN_3O_4$ |                    |
| P9     | 278    | $C_{13}H_{11}FN_2O_4$ |                    |

|     |     |                       |                                                                                    |
|-----|-----|-----------------------|------------------------------------------------------------------------------------|
| P10 | 388 | $C_{18}H_{17}FN_3O_6$ | 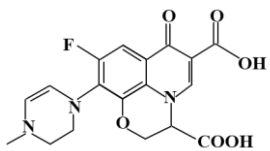 |
| P11 | 387 | $C_{18}H_{16}FN_3O_4$ | 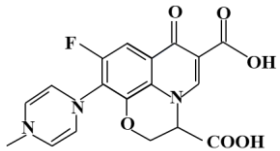 |
